# Supplementary material
Source: publisher figshare collection journal article supplement (https://frontiersin.figshare.com/ndownloader/files/12673697)

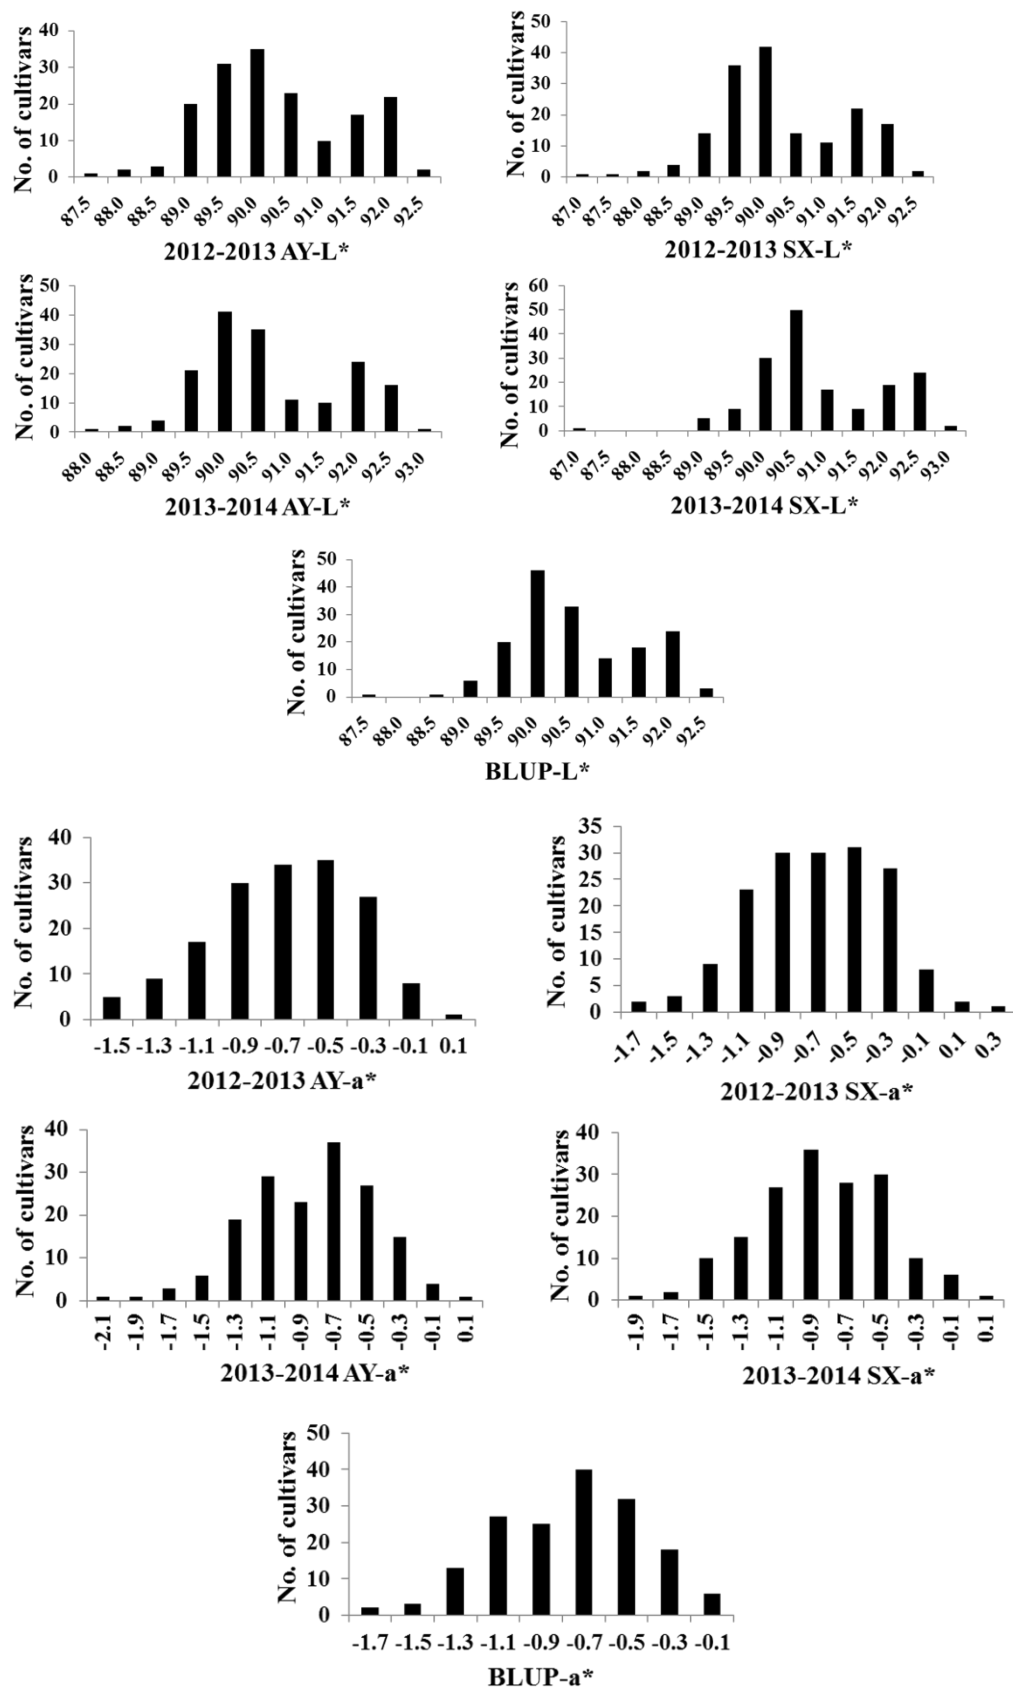

**Figure S1** Frequency distribution of flour color-related traits in 166 bread wheat cultivars across four environments. L\*, flour brightness; a\*, flour redness; b\*, flour yellowness; YPC, yellow pigment content ( $\mu\text{g}\cdot\text{g}^{-1}$ ); AY, Anyang; SX, Suixi; BLUP, best linear unbiased predictor.

Continued

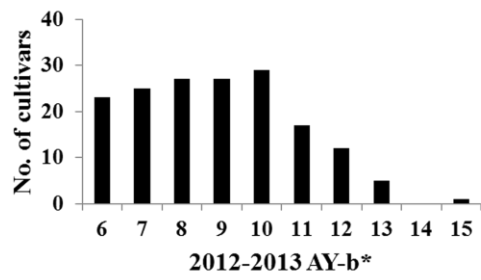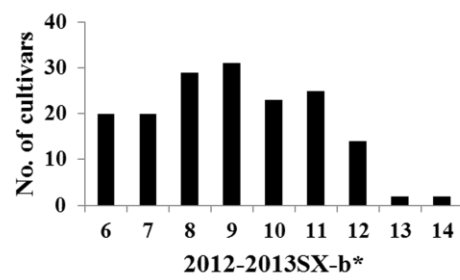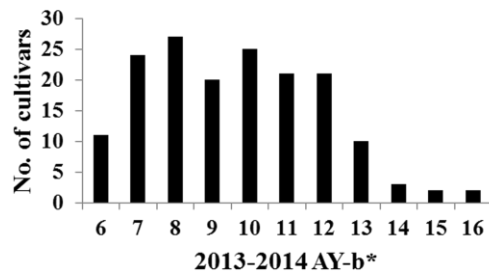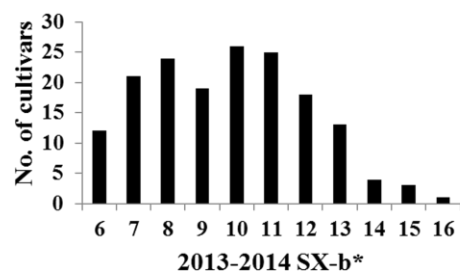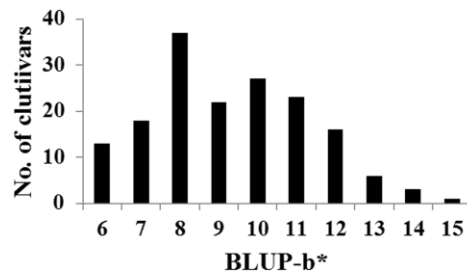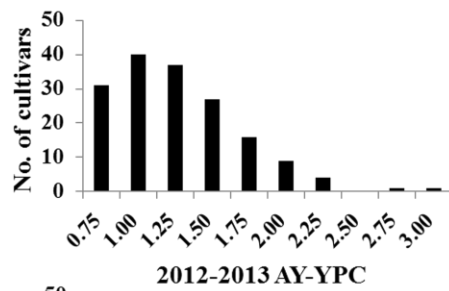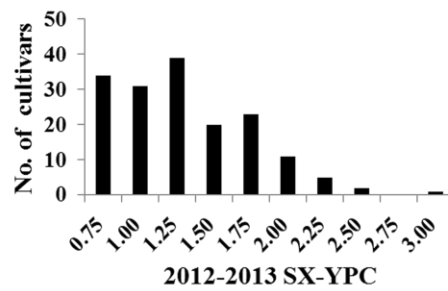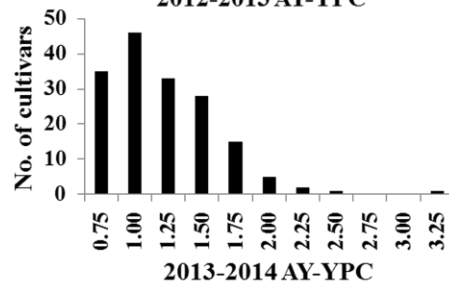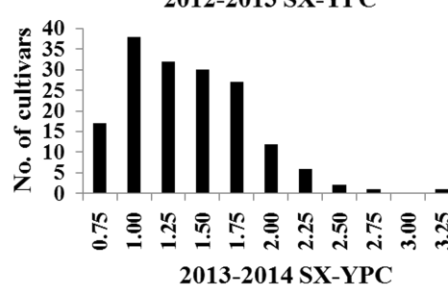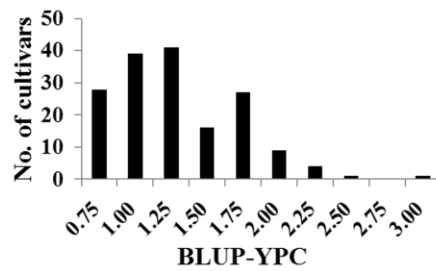

Supplement: Supplementary file [file 12673697]
